# Supplementary material for: Dark current reduction strategies using edge-on aligned donor polymers for high detectivity and responsivity organic photodetectors
Source: Royal Society of Chemistry journal article supplement (doi:10.1039/c7py00497d), 2017-01-01
Supplement: c7py00497d1.pdf [file c7py00497d1.pdf]

## Electronic Supplementary Information

### Dark Current Reduction Strategies Using Edge-on Aligned Donor Polymers for High Detectivity and Responsivity Solution-processed Organic Photodetectors

*Seung Hun Eom,<sup>a</sup> So Youn Nam,<sup>a</sup> Hee Jin Do,<sup>a</sup> Jaemin Lee,<sup>a,b</sup> Sangho Jeon,<sup>c</sup> Tae Joo Shin,<sup>c</sup> In Hwan Jung,<sup>d,\*</sup> Sung Cheol Yoon,<sup>a,b,\*</sup> and Changjin Lee<sup>a,b,\*</sup>*

<sup>a</sup> Division of Advanced Materials, Korea Research Institute of Chemical Technology (KRICT), 141 Gajeong-ro, Yuseong-gu, Daejeon 34114, Republic of Korea. E-mail: yoonsch@kRICT.re.kr (S.C.Y) & cjlee@kRICT.re.kr (C.L)

<sup>b</sup> Department of Chemical Convergence Materials, University of Science and Technology (UST), 217 Gajeong-ro, Yuseong-gu, Daejeon 34113, Republic of Korea.

<sup>c</sup> UNIST Central Research Facilities & School of Natural Science, Ulsan National Institute of Science and Technology (UNIST), 50 UNIST-gil, Eonyang-eup, Ulju-gun, Ulsan, 689-798, Republic of Korea

<sup>d</sup> Department of Chemistry, Kookmin University, 77 Jeongneung-ro, Seongbuk-gu, Seoul 02707, Republic of Korea. E-mail: ihjung@kookmin.ac.kr (I.H.J)

## Synthesis of monomers

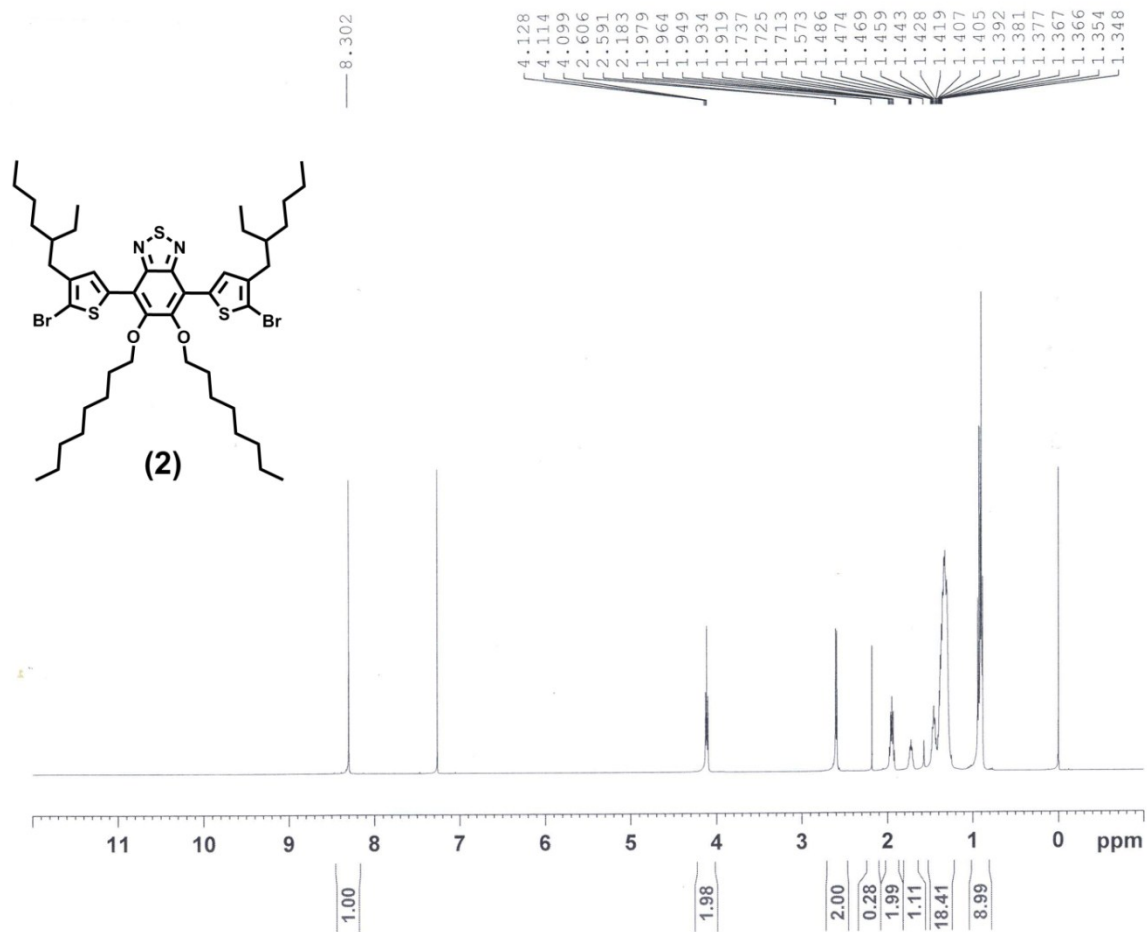

**Figure S1.** <sup>1</sup>H NMR spectra of 4,7-bis(5-bromo-4-(2-ethylhexyl)thiophen-2-yl)-5,6-bis(octyloxy)benzo[c][1,2,5]thiadiazole (2)

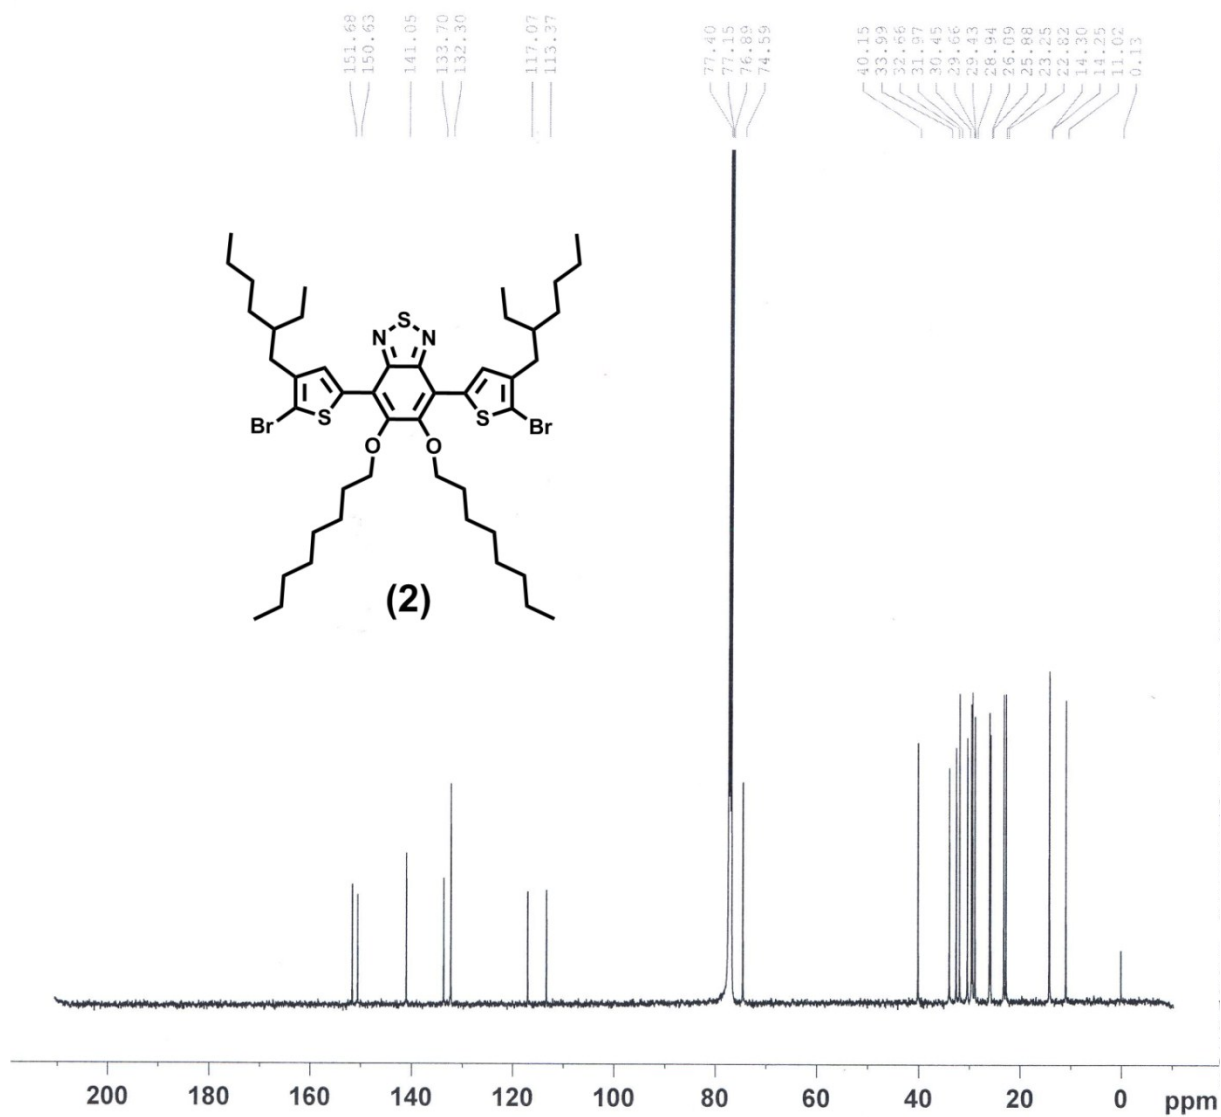

**Figure S2.** <sup>13</sup>C NMR spectra of 4,7-bis(5-bromo-4-(2-ethylhexyl)thiophen-2-yl)-5,6-bis(octyloxy)benzo[c][1,2,5]thiadiazole (2)

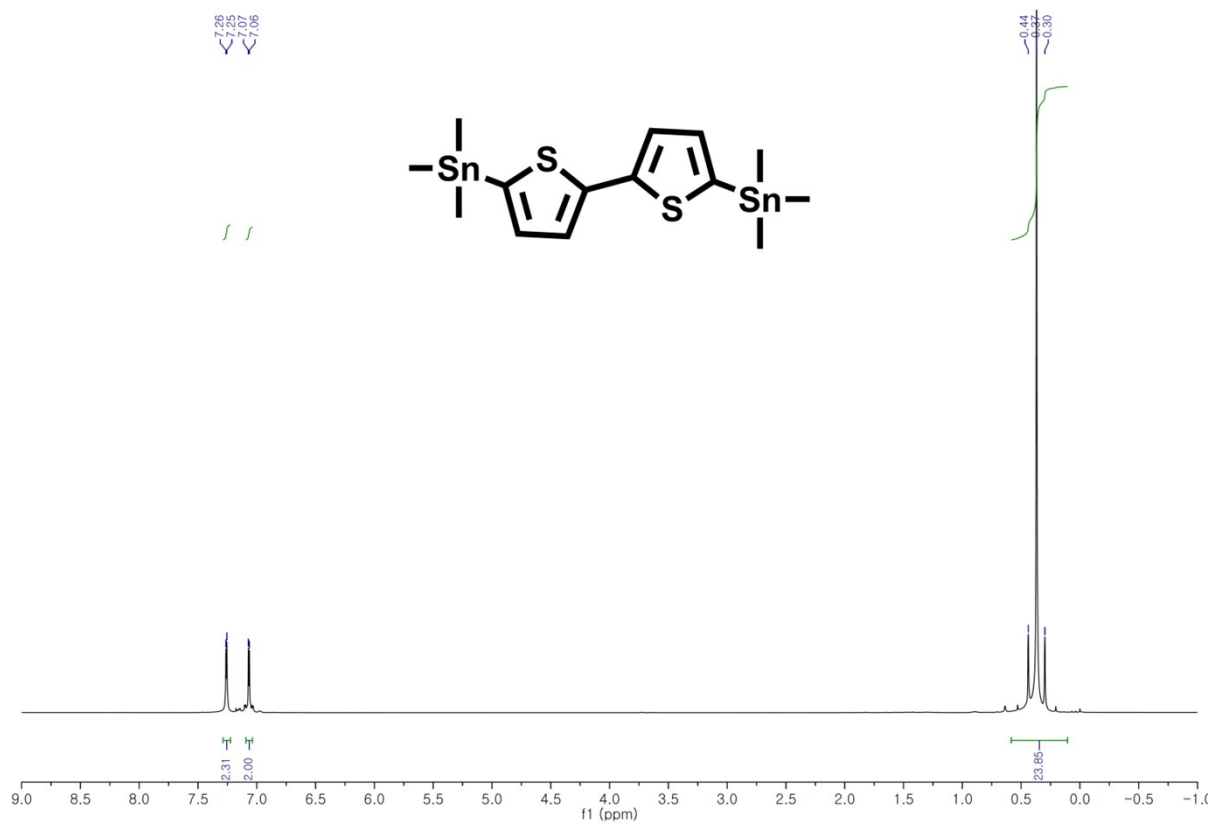

**Figure S3.** <sup>1</sup>H NMR spectra of 5,5'-bis(trimethylstannyl)-2,2'-bithiophene

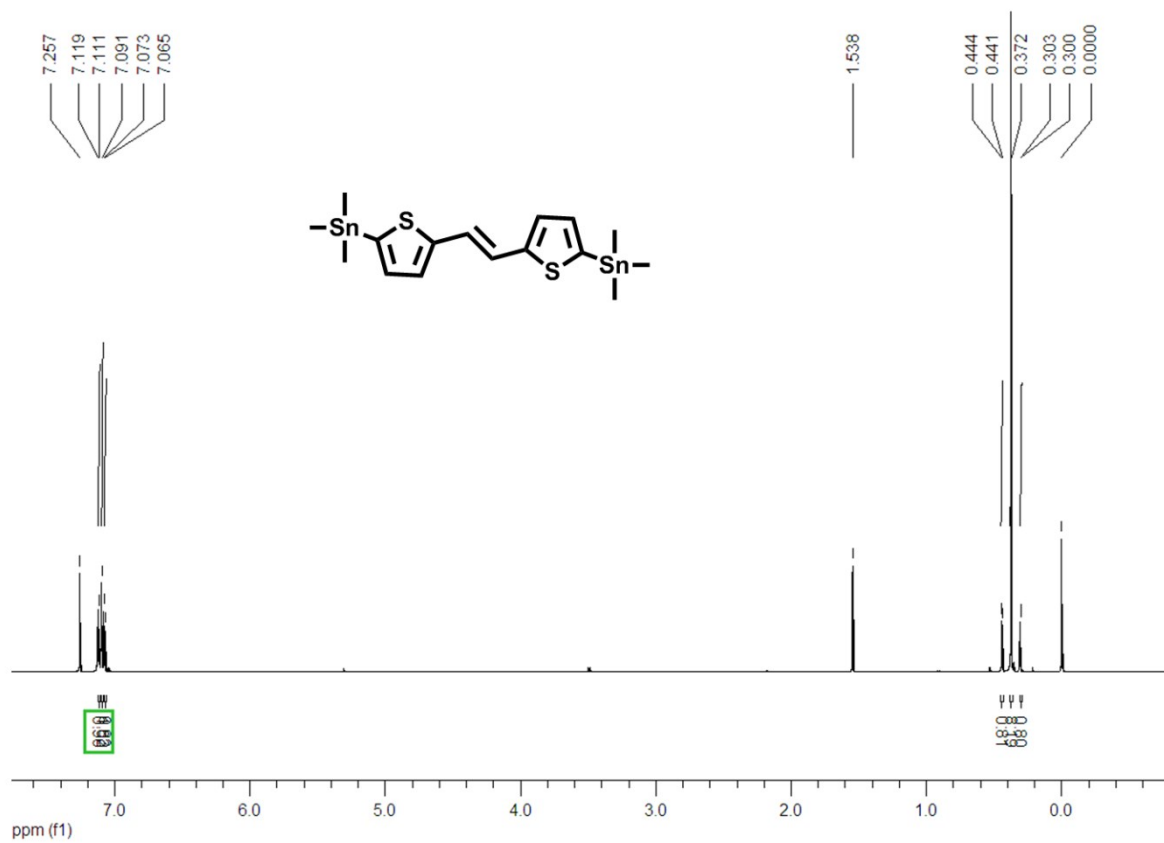

**Figure S4.** <sup>1</sup>H NMR spectra of (*E*)-1,2-bis(5-(trimethylstannyl)thiophen-2-yl)ethene

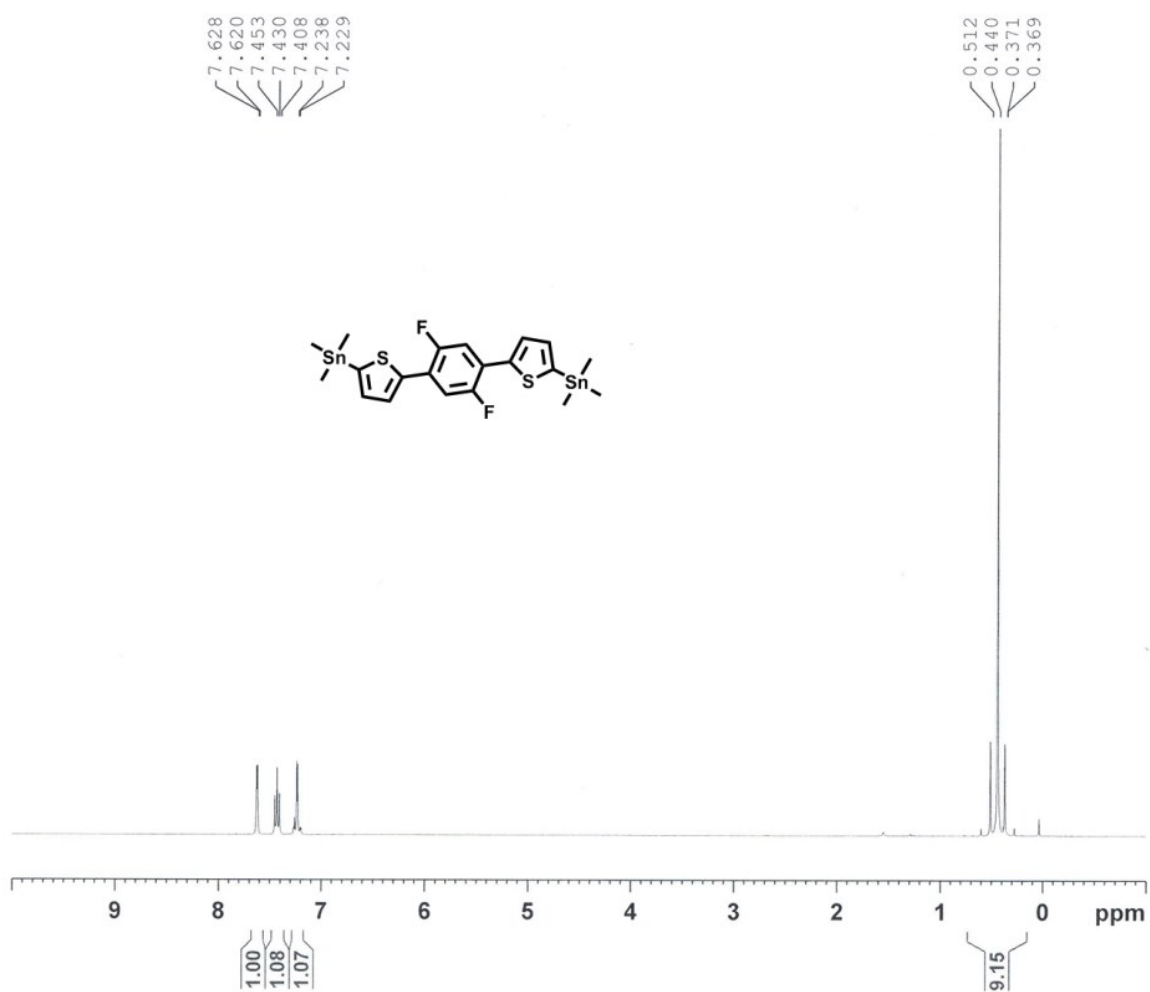

**Figure S5.** <sup>1</sup>H NMR spectra of ((2,5-difluoro-1,4-phenylene)bis(thiophene-5,2-diyl))bis(trimethylstannane)

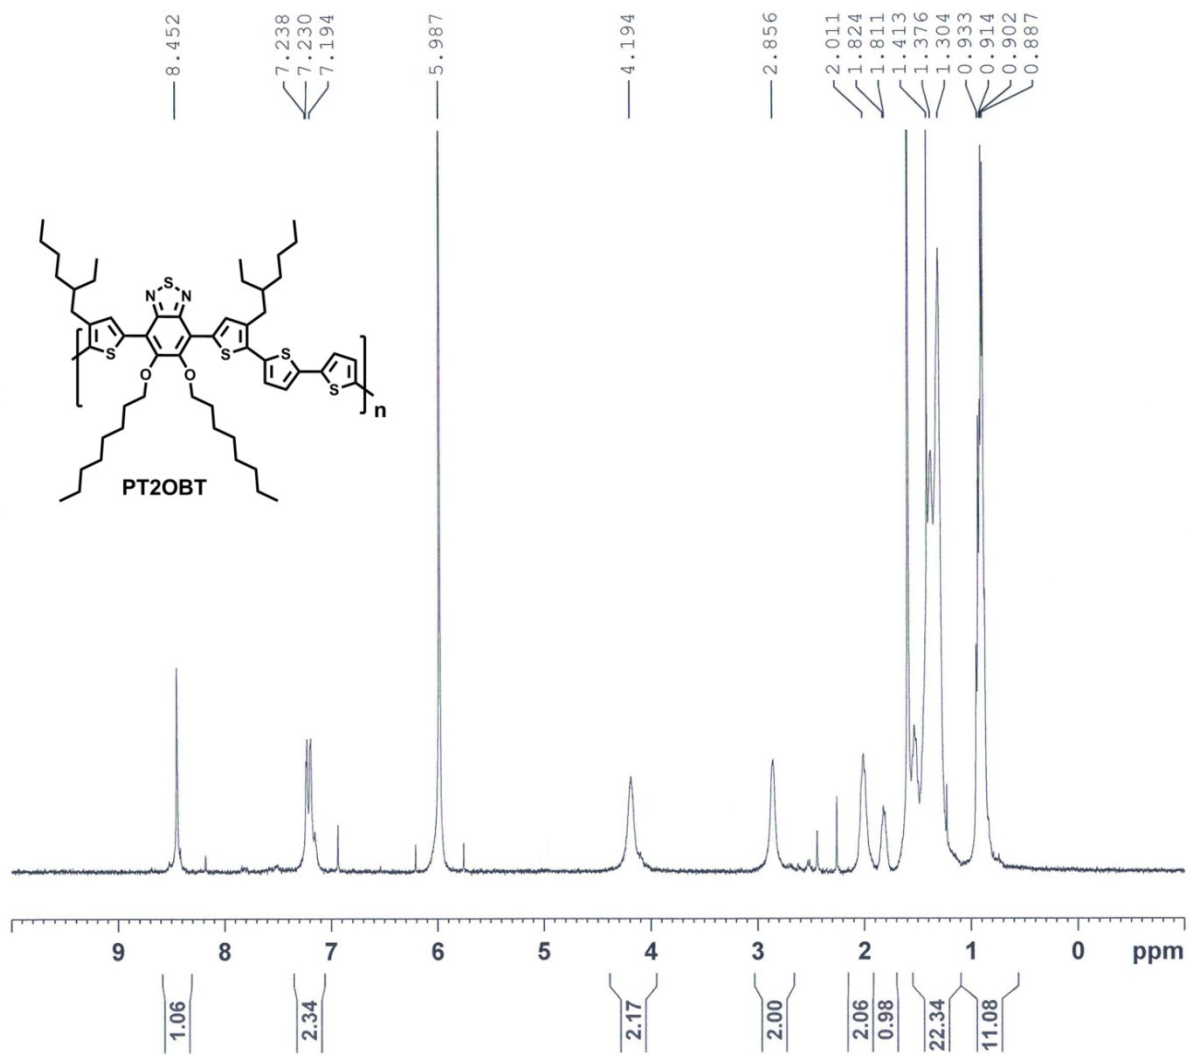

Figure S6. <sup>1</sup>H NMR spectrum of PT2OBT

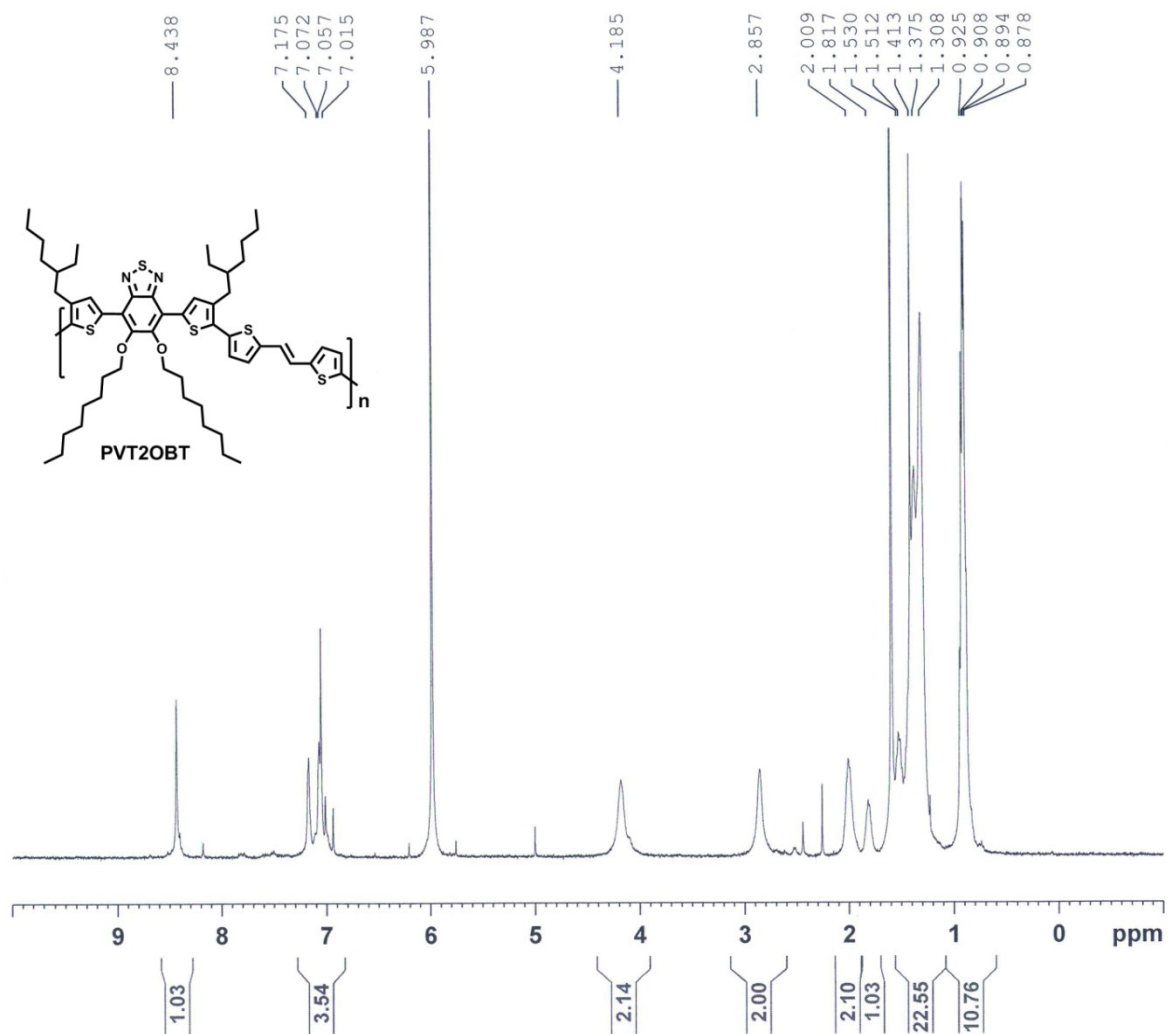

Figure S7. <sup>1</sup>H NMR spectrum of PVT2OBT



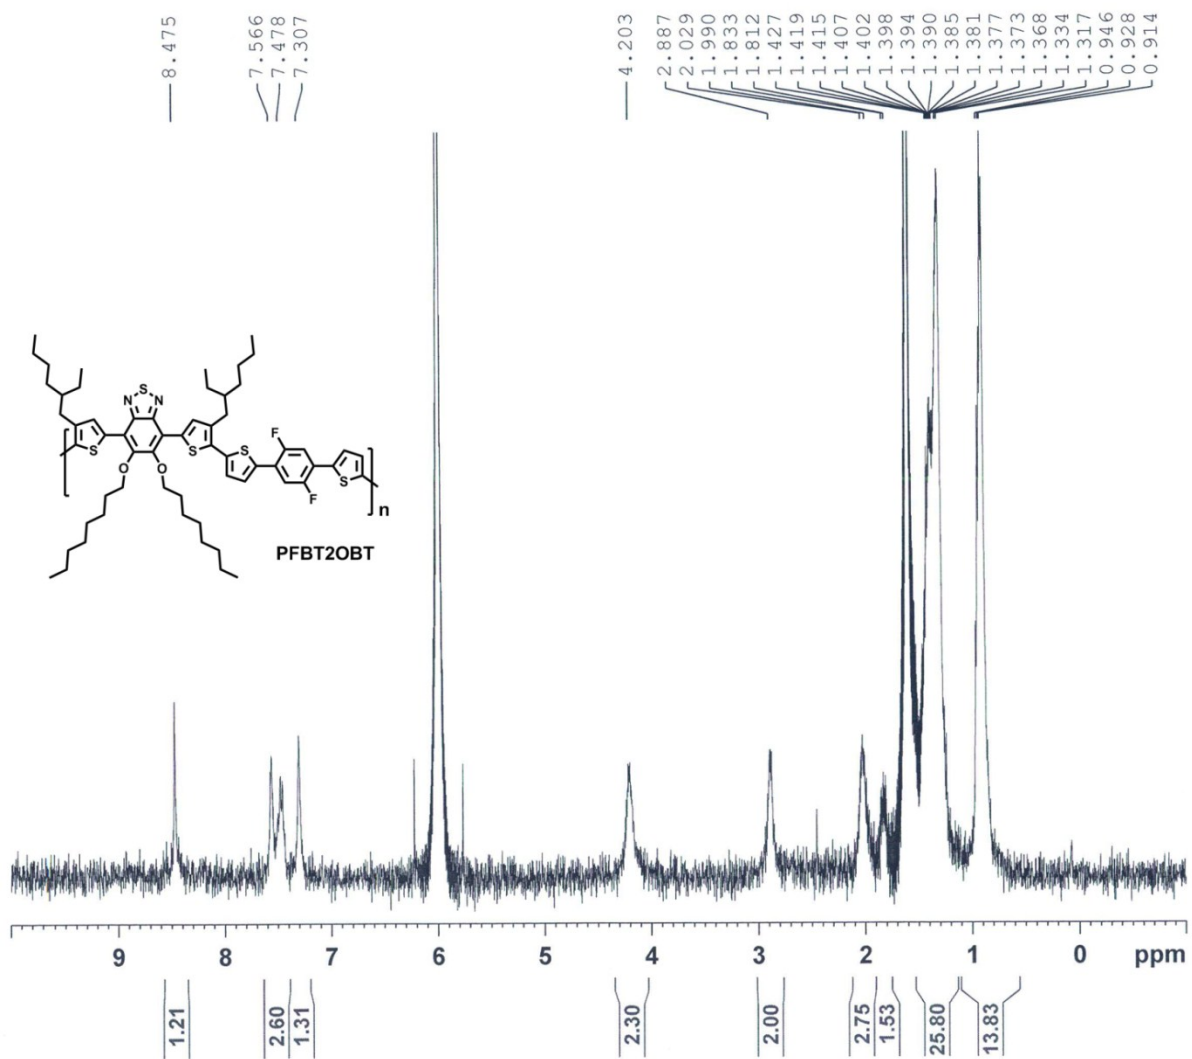

**Figure S8.** <sup>1</sup>H NMR spectrum of PFBT2OBT

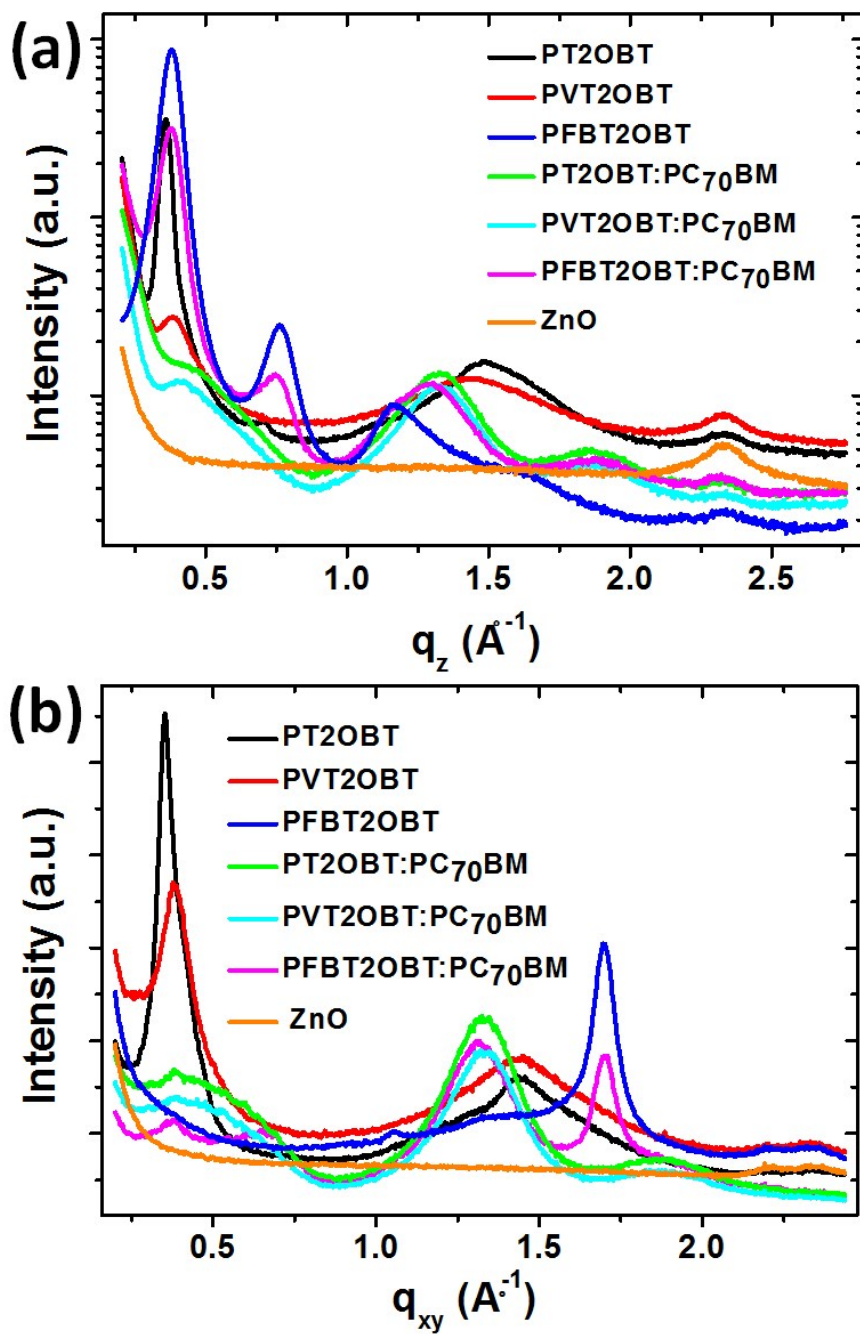

**Figure S9.** (a) Out-of-plane and (b) in-plane line cuts of neat polymers (PT2OBT, PVT2OBT and PFBT2OBT) and blend films (PT2OBT:PC<sub>70</sub>BM, PVT2OBT:PC<sub>70</sub>BM and PFBT2OBT:PC<sub>70</sub>BM)

### Steady-state space-charge-limited current (SCLC) mobility

The charge carrier mobilities were calculated using the SCLC model, where the SCLC is described by  $J = 9\epsilon_0\epsilon_r\mu V^2/8L^3$ , where  $J$  is the current density,  $L$  is the film thickness of the active layer,  $\mu$  is the hole mobility,  $\epsilon_r$  is the relative dielectric constant of the transport medium,  $\epsilon_0$  is the permittivity of free space ( $8.85 \times 10^{-12}$  F m<sup>-1</sup>),  $V$  is the internal voltage in the device, and  $V = V_{appl} - V_r - V_{bi}$ , where  $V_{appl}$  is the applied voltage to the device,  $V_r$  is the voltage drop due to contact resistance and series resistance between the electrodes, and  $V_{bi}$  is the built-in voltage due to the relative work function difference of the two electrodes.

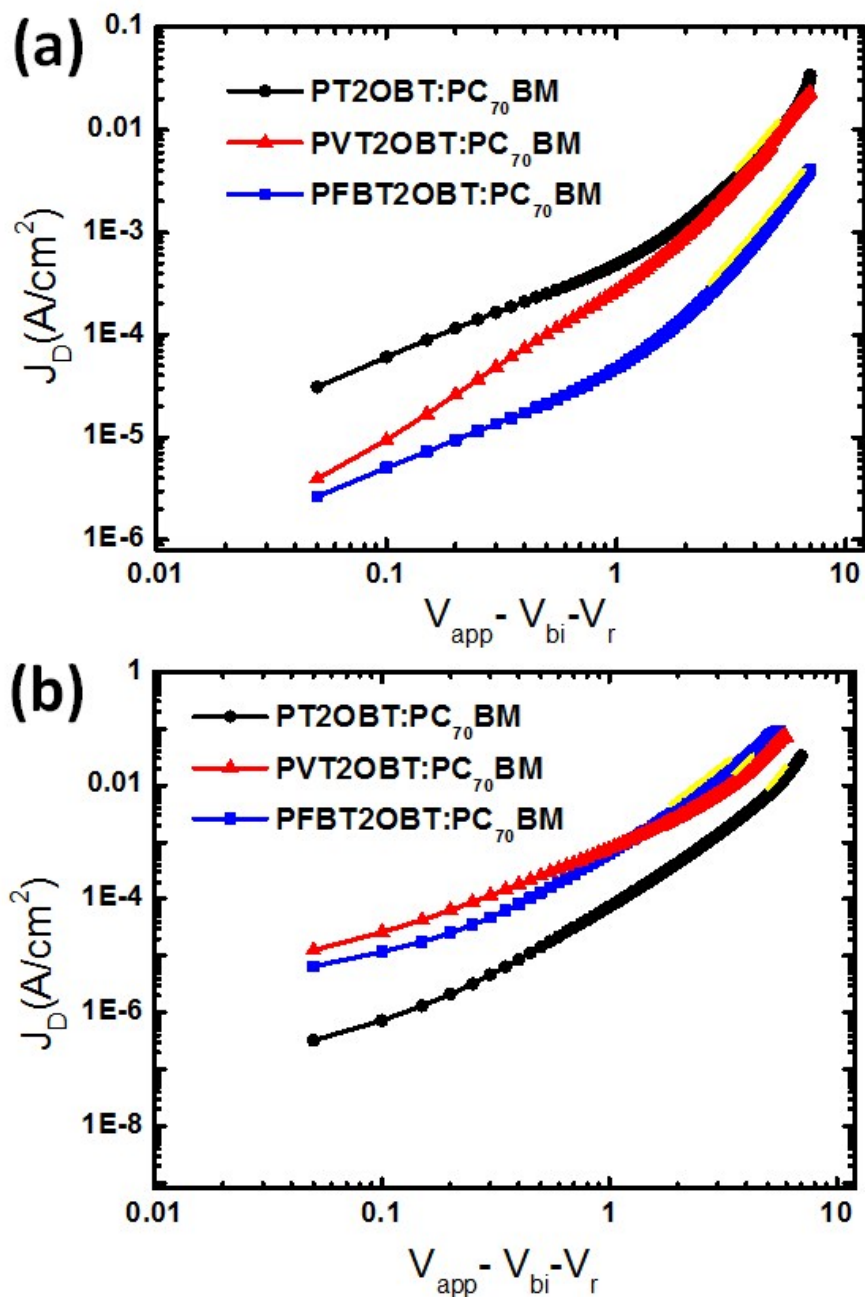

**Figure S10.**  $J$ - $V$  characteristics of (a) the hole-only devices with the structure of ITO/PEDOT:PSS/Polymer:PC<sub>70</sub>BM (1:1.5 w/w in ODCB)/MoO<sub>3</sub>/Ag and (b) the electron-only devices with that of ITO/ZnO/Polymer:PC<sub>70</sub>BM (1:1.5 w/w in ODCB)/LiF/Al. The charge mobilities were calculated by fitting the  $J$ - $V$  curves in the SCLC regime.

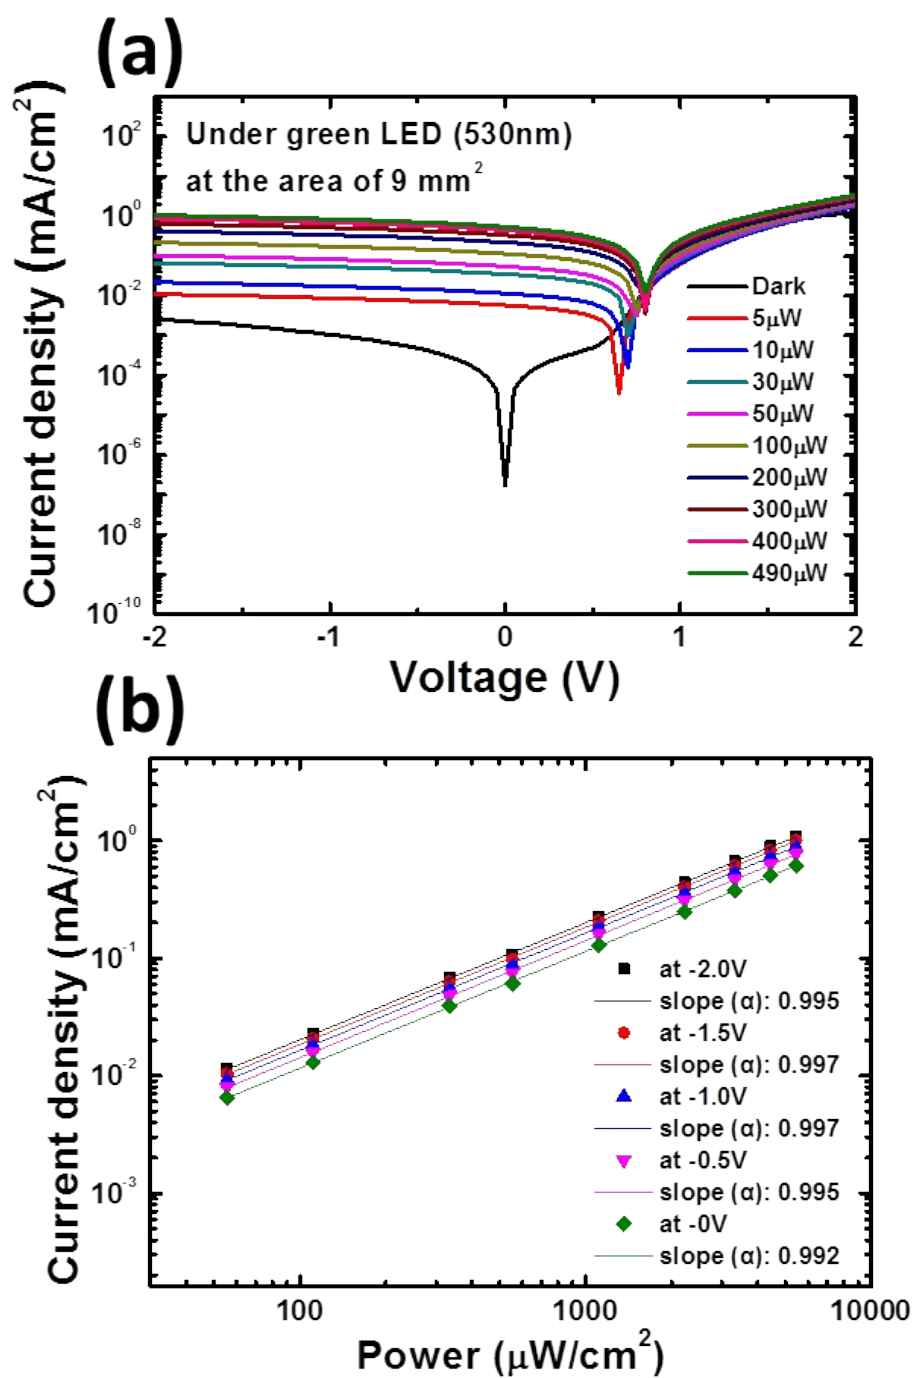

**Figure S11.** (a) *J-V* characteristics of PT2OBT:PC<sub>70</sub>BM devices at the active layer thickness of ~180 nm. (b) Current density vs light intensity at different reverse bias (0, -0.5, -1, -1.5 and -2 V).

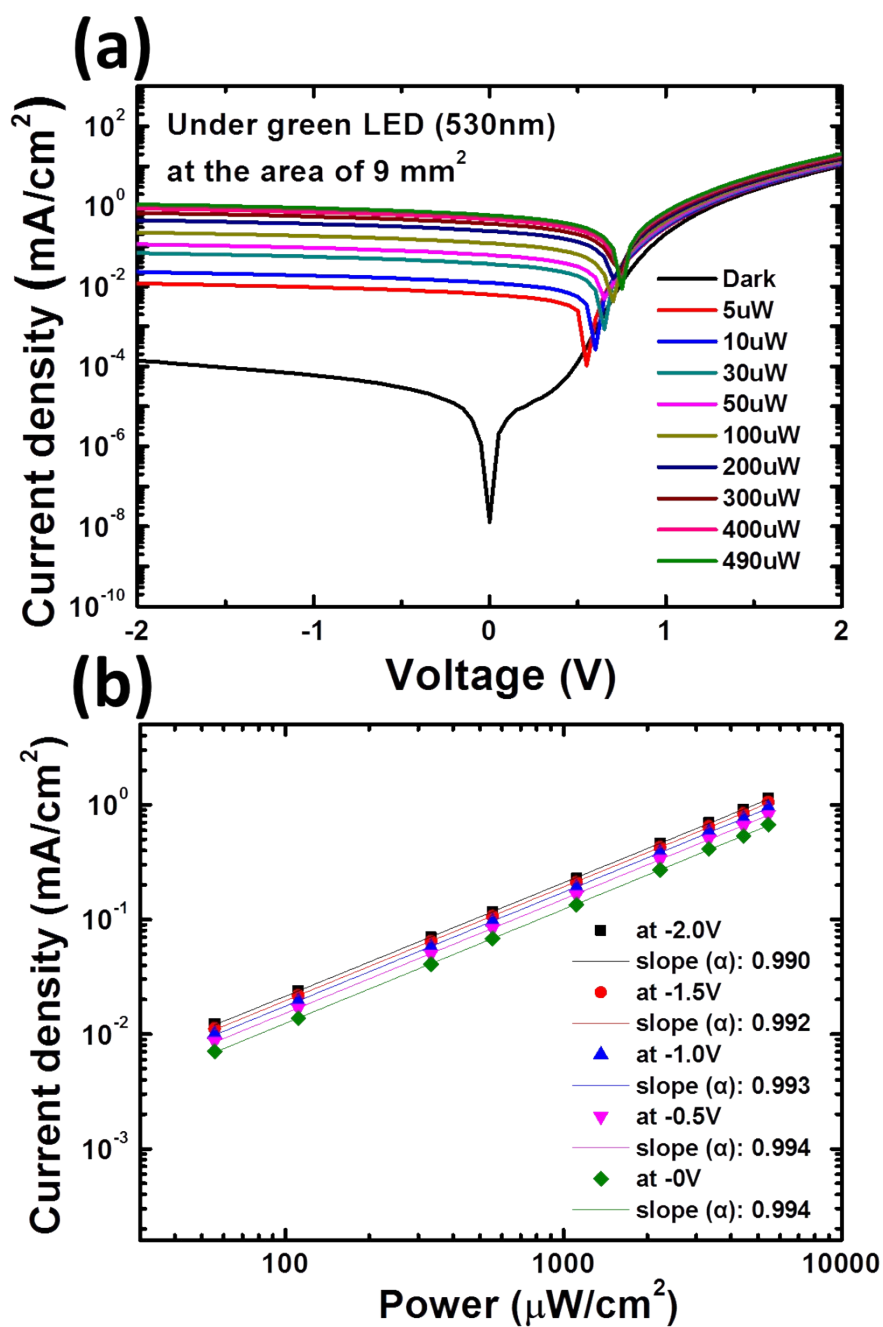

**Figure S12.** (a)  $J$ - $V$  characteristics of PVT2OBT:PC<sub>70</sub>BM devices at the active layer thickness of ~180 nm. (b) Current density vs light intensity at different reverse bias (0, -0.5, -1, -1.5 and -2 V).

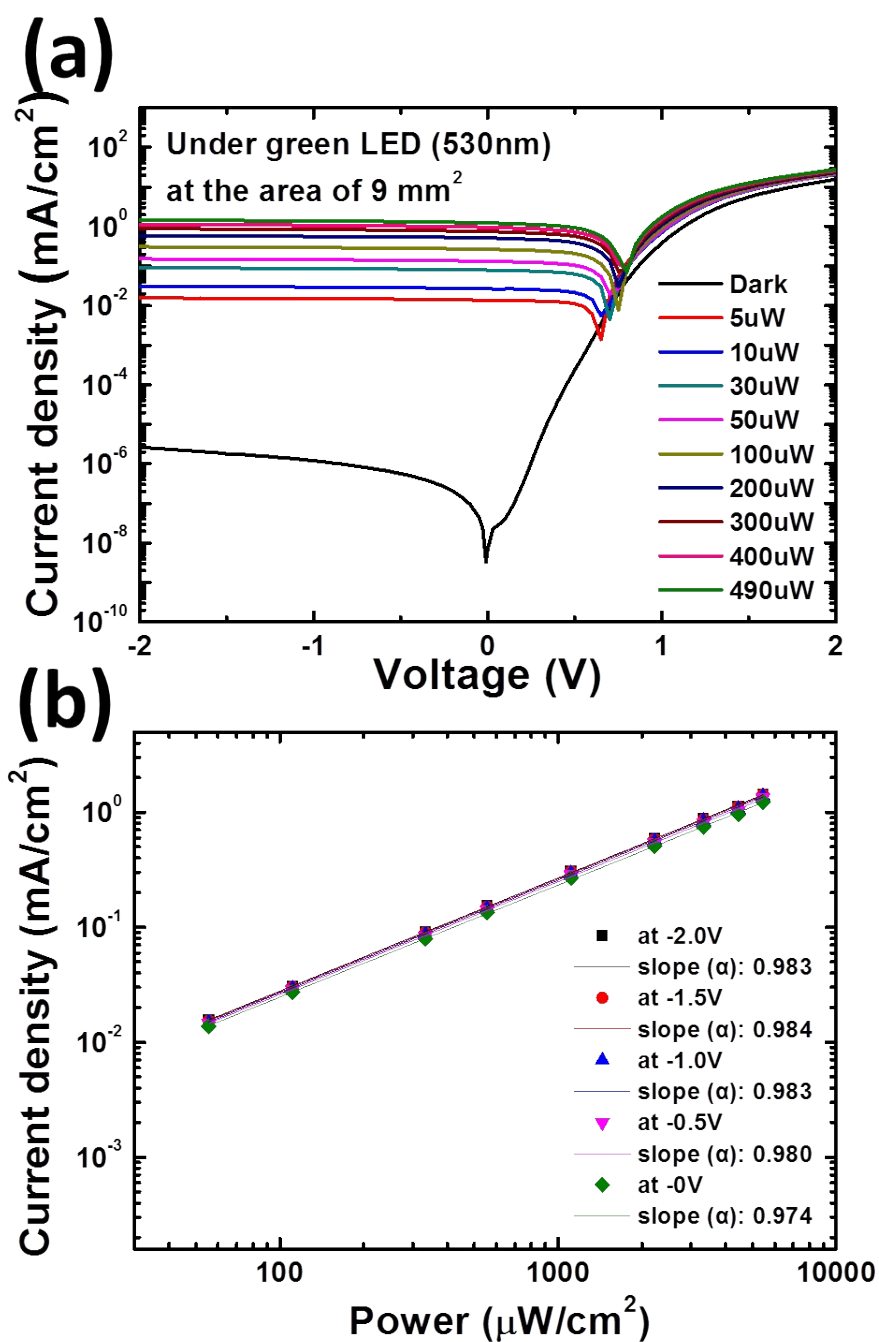

**Figure S13.** (a) *J-V* characteristics of PFBT2OBT:PC<sub>70</sub>BM devices at the active layer thickness of ~180 nm. (b) Current density vs light intensity at different reverse bias (0, -0.5, -1, -1.5 and -2 V).

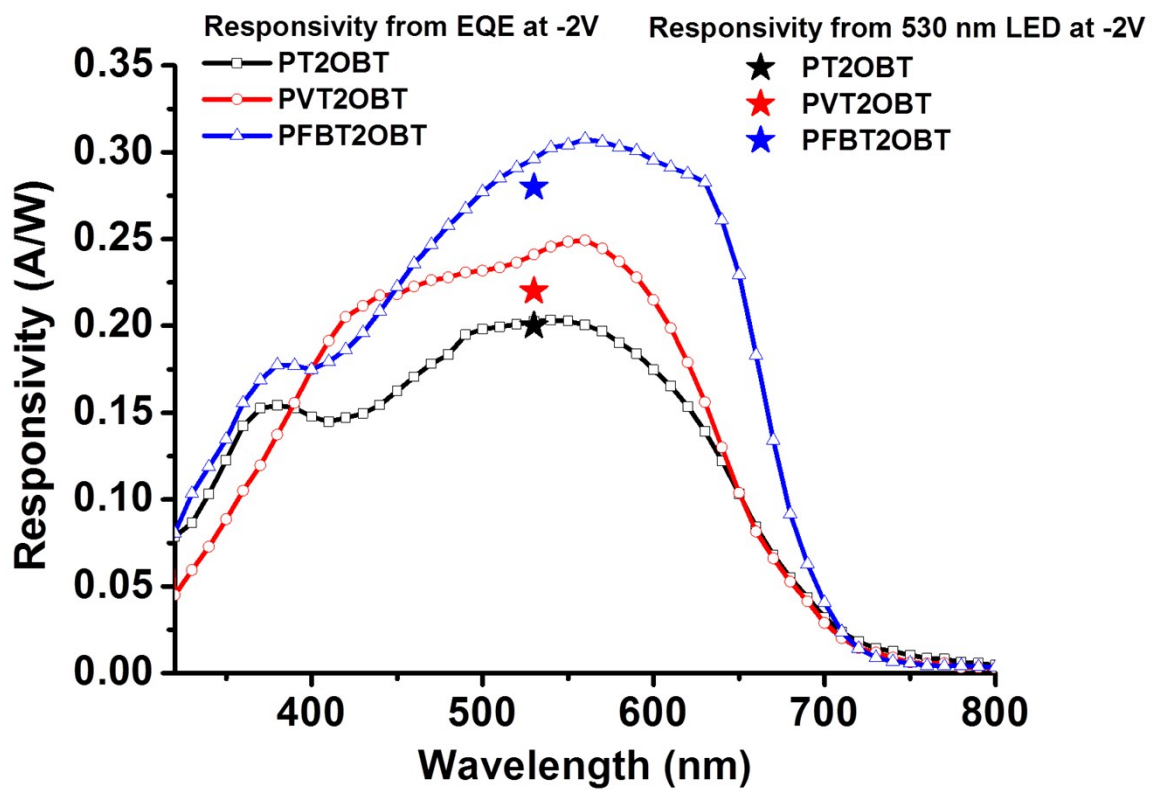

**Figure S14.** The calculated responsivity of PT2OBT, PVT2OBT and PFBT2OBT from EQE measurement at -2V (line + symbol) and the responsivity from direct measurement under 530 nm LED at -2V (star symbol).
